# Supplementary material for: Human milk inhibits some enveloped virus infections, including SARS-CoV-2, in an intestinal model
Source: Life Sci Alliance. 2022 Aug 4;5(12):e202201432. doi: 10.26508/lsa.202201432 (PMC9354649; doi:10.26508/lsa.202201432)
Supplement: Supplementary file 2 [file LSA-2022-01432_TableS1.xlsx]

## Sheet: Sheet1
Gene Name	Fold change	P-adjusted value
	All samples (n=12)	All samples (n=12)	Least correlated (n=2)	Most correlated (n=2)
ADAM22	-1.51037	3,52E-08	3.3e-11	0.050059
SKIV2L2	0.610441	1,95E-08	0.001506	0.227648
CAPG	-0.9506	0,002493	1.43e-07	0.373228
VPS13D	-0.82883	4,80E-05	0.157757	0.051371
KMT2C	-0.7611	0,000108	1.27e-07	0.594996
CDH3	-0.97042	0,001758	0.000147	0.217467
NTHL1	1.33994	7,09E-09	0.001454	0.115031
SREBF1	-1.22176	3,01E-08	0.000337	0.123532
IGF2BP2	-0.67871	3,99E-05	9.24e-05	0.408682
ENO1	0.568754	0,003683	8.44e-07	0.011365
SMARCA2	-0.68131	3,37E-11	0.029862	0.38236
KIAA0020	0.767974	0,008172	1.67e-08	0.983763
CIRBP	-0.55308	7,40E-08	0.194874	0.261833
PIK3IP1	-0.92522	8,43E-07	0.000168	0.250956
TAZ	-0.78607	2,57E-06	0.039288	0.070506
ABHD11	0.755872	1,05E-06	0.002699	0.064208
MRPL32	1.00326	7,00E-07	2.6e-08	0.222214
YKT6	-0.89255	2,04E-06	0.013303	0.077302
SH3PXD2A	-1.24008	3,85E-05	1.11e-11	0.147135
FBXO3	0.690479	2,78E-11	0.009462	0.101269
MADD	-0.96008	6,89E-23	0.00032	0.109585
PHACTR2	0.808947	0,000101	0.064801	0.276121
ABTB1	-1.3908	7,31E-19	1.13e-08	0.055835
DNAH1	-1.36274	1,15E-07	1.41e-12	0.086014
QSOX1	-1.05007	6,59E-05	4.85e-05	0.082183
F3	1.20637	0,00016	2.18e-05	0.03135
NDUFB3	0.988775	1,87E-09	4.13e-16	0.379415
INVS	1.0916	4,30E-13	0.000132	0.011639
GALNT12	-0.90042	2,13E-12	0.010797	0.125586
NLN	1.42912	4,92E-10	4.04e-06	0.38512
SMUG1	0.759828	9,75E-08	0.000693	0.332998
RAP2C	-0.98648	5,71E-11	1.22e-06	0.04844
AGO2	-0.94318	2,98E-15	0.019953	0.219664
POF1B	0.987843	1,24E-17	0.000275	0.026939
PTPRB	-1.255	3,53E-06	3.11e-12	0.79456
PRRC2B	-0.95616	2,76E-15	0.000274	0.299354
HMGCS2	2.94272	1,57E-07	3.3e-108	0.170966
CYP2J2	1.13308	0,000138	0.000692	0.009622
ANXA1	1.46378	0,006028	6.83e-08	0.332772
SLC41A2	1.11618	2,19E-13	0.001198	0.025619
CASP1	1.61342	5,83E-11	0.001406	0.020828
SEPT-11	0.902669	6,91E-06	1.89e-06	0.222562
TMTC3	1.09571	3,26E-16	0.000105	0.030783
IGF1R	-0.86745	1,85E-15	0.001341	0.255824
FOXK2	-0.78984	1,75E-18	0.011051	0.402608
HSPG2	-0.85063	0,000342	0.163837	0.01033
NCEH1	1.20436	2,01E-06	7.26e-12	0.224514
SIDT2	-1.01262	2,71E-18	1.95e-05	0.281621
SLC7A7	0.956354	0,009311	0.001931	0.003258
NR2F6	-0.90995	1,99E-12	0.004638	0.305401
TFF3	-1.26667	0,020198	4.06e-13	0.018657
ATP1A1	-0.91385	2,04E-07	0.011438	0.009168
SLC6A20	-0.66498	0,010107	0.008166	0.000559
SLC51A	-1.65069	1,63E-06	2.62e-39	0.727939
HPGD	1.6186	6,53E-11	5.79e-11	0.000833
FOXK1	-0.84607	1,38E-07	0.007516	0.305401
ALDH1A1	1.11023	0,000324	4.1e-10	0.085934
ZNF488	-1.17816	3,11E-11	0.01052	0.009364
IFI27L1	-1.12992	2,38E-10	8.22e-05	0.012987
KRT20	0.973662	8,18E-08	0.001137	0.030755
CTPS1	1.05912	0,026125	5.19e-16	0.167599
TNKS	-0.87234	7,53E-14	0.004838	0.061143
PRPF8	-0.68324	3,09E-05	0.200232	0.046682
ZBTB33	1.05053	2,86E-10	0.007164	0.029708
BET1L	-1.09859	2,34E-09	5.34e-05	0.012919
ALOX15B	-1.77779	0,000101	1.03e-13	0.324488
AFMID	-0.99071	4,83E-06	0.019401	0.010877
GAS6	-1.03466	2,54E-06	0.033991	0.162198
NDUFA4	0.991194	1,44E-13	8e-14	0.069661
SLC39A10	-0.74405	0,018762	0.030249	0.0096
ATP1A1OS	-0.74433	7,28E-05	0.031441	0.023681
ARPC4	0.920611	7,27E-14	7.65e-06	0.047096
WTAPP1	-1.28176	0,000185	0.001506	0.408106
RP11-113K21,4	1.38408	2,88E-19	0.000146	0.064653
RP11-96D1,10	-0.78555	0,000176	0.103484	0.586947
RP11-498C9,13	-1.12573	7,69E-06	2.04e-06	0.149154
RP11-694I15,7	-2.12778	3,50E-12	0.007644	0.658945
