# Supplementary material for: Human milk inhibits some enveloped virus infections, including SARS-CoV-2, in an intestinal model
Source: Life Sci Alliance. 2022 Aug 4;5(12):e202201432. doi: 10.26508/lsa.202201432 (PMC9354649; doi:10.26508/lsa.202201432)
Supplement: Supplementary file 3 [file LSA-2022-01432_TableS2.xlsx]

## Sheet: Sheet1
2A. Upregulated
Dataset	p-value	Adj p-value	Odds ratio	Enrichr score
500 genes up-regulated by SARS-CoV-2 in human intestinal organoids from GSE149312 expansion 60h	3.782e-51	1.789e-48	5.12	594.4
500 genes up-regulated by SARS-CoV-1 in human intestinal organoids from GSE149312 60h	7.141e-44	1.689e-41	4.62	459.22
Top 500 down genes for SARS-CoV-2 infection 48 hpi in human alveolar organoids for GSE152586	5.966e-36	9.406e-34	4.09	331.41
500 genes down-regulated by SARS-CoV-2 in human Calu3 cells from GSE147507	1.214e-17	1.436e-15	2.69	104.85
COVID19-Nsp1 protein host PPI from Krogan	0.002007	0.01265	15.76	97.87
500 genes down regulated by SARS-COV-2 infection of Calu3 cells	2.248e-16	1.772e-14	2.63	94.63
2B. Downregulated
Dataset	p-value	Adj p-value	Odds ratio	Enrichr score
500 genes down-regulated by SARS-CoV-1 in human intestinal organoids from GSE149312 60h	1.338e-37	6.277e-35	4.76	404.22
500 genes down-regulated by SARS-CoV-2 in human intestinal organoids from GSE149312 expansion 60h	1.04e-33	2.438e-31	4.45	337.93
500 genes up-regulated by SARS-CoV-2 (0.2 MOI) in human A549 cells transduced with ACE2 vector from GSE147507	3.103e-18	4.851e-16	3.16	127.28
500 genes up-regulated by SARS-CoV-2 in A549-ACE2 cells from GSE154613 loperamide	3.722e-16	4.364e-14	2.99	106.13
500 genes down-regulated by SARS-CoV-1 in human intestinal organoids from GSE149312 24h	4.927e-16	4.622e-14	2.97	104.71
