# Supplementary material for: Human milk inhibits some enveloped virus infections, including SARS-CoV-2, in an intestinal model
Source: Life Sci Alliance. 2022 Aug 4;5(12):e202201432. doi: 10.26508/lsa.202201432 (PMC9354649; doi:10.26508/lsa.202201432)
Supplement: Supplementary file 4 [file LSA-2022-01432_TableS3.xlsx]

## Sheet: Sheet1
Virus	Name	Concentration (pmol/µL)	Sequence (5'- 3')
SARS-CoV-2	SARS-CoV-2 Forward	20	ACAGGTACGTTAATAGTTAATAGCGT
SARS-CoV-2	SARS-CoV-2 Reverse	20	ATATTGCAGCAGTACGCACACA
SARS-CoV-2	SARS-CoV-2 Probe	10	FAM-ACACTAGCCATCCTTACTGCGCTTCG-BHQ1
MERS-CoV	MERS-CoV Forward	45	GCAACGCGCGATTCAGTT
MERS-CoV	MERS-CoV Reverse	30	GCCTCTACACGGGACCCATA
MERS-CoV	MERS-CoV Probe	5	FAM-CTCTTCACATAATCGCCCCGAGCTCG -6-carboxy-N,N,N,N
RSV-A	RSV-A Forward	45	AGATCAACTTCTGTCATCCAGCAA
RSV-A	RSV-A Reverse	30	TTCTGCACATCATAATTAGGAGTATCAAT
RSV-A	RSV-A Probe	5	Drfly-CACCATCCAACGGAGCACAGGAGAT-BHQ2
EV-A71	EV-A71 Forward	45	GACATGGTGYGAAGAGTCTATTGA
EV-A71	EV-A71 Reverse	30	GATTGTCACCATAAGCAGCCA
EV-A71	EV-A71 Probe	5	Drfly-CGGAACCGACTACTTTGGGTGTCCGTGTTTC-BHQ2
